# Supplementary material
Source: HighWire-hosted journal article supplement (https://erj.ersjournals.com/content/61/3/2201306)

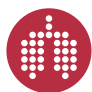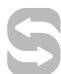

SHAREABLE PDF

# GPR183 antagonism reduces macrophage infiltration in influenza and SARS-CoV-2 infection

Cheng Xiang Foo<sup>1,8</sup>, Stacey Bartlett<sup>1,8</sup>, Keng Yih Chew<sup>2</sup>, Minh Dao Ngo<sup>1</sup>, Helle Bielefeldt-Ohmann<sup>2,3</sup>, Buddhika Jayakody Arachchige<sup>4</sup>, Benjamin Matthews<sup>4</sup>, Sarah Reed<sup>4</sup>, Ran Wang<sup>1</sup>, Christian Smith<sup>1</sup>, Matthew J. Sweet<sup>3,5</sup>, Lucy Burr<sup>6</sup>, Kavita Bisht<sup>1</sup>, Svetlana Shatunova<sup>1</sup>, Jane E. Sinclair<sup>2</sup>, Rhys Parry<sup>2</sup>, Yuanhao Yang<sup>1</sup>, Jean-Pierre Lévesque<sup>1</sup>, Alexander Khromykh<sup>2,3</sup>, Mette Marie Rosenkilde<sup>7</sup>, Kirsty R. Short<sup>2,3</sup> and Katharina Ronacher<sup>1,3</sup>

<sup>1</sup>Mater Research Institute, Translational Research Institute, The University of Queensland, Brisbane, Australia. <sup>2</sup>School of Chemistry and Molecular Biosciences, The University of Queensland, Brisbane, Australia. <sup>3</sup>Australian Infectious Diseases Research Centre, The University of Queensland, Brisbane, Australia. <sup>4</sup>Centre for Clinical Research, The University of Queensland, Brisbane, Australia. <sup>5</sup>Institute for Molecular Bioscience (IMB), IMB Centre for Inflammation and Disease Research, The University of Queensland, Brisbane, Australia. <sup>6</sup>Dept of Respiratory Medicine, Mater Adult Hospital, Brisbane, Australia. <sup>7</sup>Dept of Biomedical Sciences, University of Copenhagen, Copenhagen, Denmark. <sup>8</sup>Contributed equally to this work.

Corresponding author: Katharina Ronacher ([katharina.ronacher@mater.uq.edu.au](mailto:katharina.ronacher@mater.uq.edu.au))

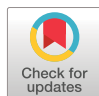

Shareable abstract (@ERSpublications)

**Viral infections trigger oxysterol production in the lung, attracting macrophages via GPR183. Antagonising GPR183 reduced inflammation and disease severity in SARS-CoV-2 infection, making GPR183 a putative target for therapeutic intervention.** <https://bit.ly/3DXIJCY>

**Cite this article as:** Foo CX, Bartlett S, Chew KY, *et al.* GPR183 antagonism reduces macrophage infiltration in influenza and SARS-CoV-2 infection. *Eur Respir J* 2023; 61: 2201306 [DOI: 10.1183/13993003.01306-2022].

This single-page version can be shared freely online.

Copyright ©The authors 2023.

This version is distributed under the terms of the Creative Commons Attribution Non-Commercial Licence 4.0. For commercial reproduction rights and permissions contact [permissions@ersnet.org](mailto:permissions@ersnet.org)

This article has an editorial commentary:  
<https://doi.org/10.1183/13993003.02417-2022>

Received: 28 June 2022  
Accepted: 20 Oct 2022

## Abstract

**Rationale** Severe viral respiratory infections are often characterised by extensive myeloid cell infiltration and activation and persistent lung tissue injury. However, the immunological mechanisms driving excessive inflammation in the lung remain poorly understood.

**Objectives** To identify the mechanisms that drive immune cell recruitment in the lung during viral respiratory infections and identify novel drug targets to reduce inflammation and disease severity.

**Methods** Preclinical murine models of influenza A virus and severe acute respiratory syndrome coronavirus 2 (SARS-CoV-2) infection.

**Results** Oxidised cholesterol and the oxysterol-sensing receptor GPR183 were identified as drivers of monocyte/macrophage infiltration to the lung during influenza A virus (IAV) and SARS-CoV-2 infection. Both IAV and SARS-CoV-2 infection upregulated the enzymes cholesterol 25-hydroxylase (CH25H) and cytochrome P450 family 7 subfamily member B1 (CYP7B1) in the lung, resulting in local production of the oxidised cholesterol 25-hydroxycholesterol (25-OHC) and 7 $\alpha$ ,25-dihydroxycholesterol (7 $\alpha$ ,25-OHC). Loss-of-function mutation of Gpr183 or treatment with a GPR183 antagonist reduced macrophage infiltration and inflammatory cytokine production in the lungs of IAV- or SARS-CoV-2-infected mice. The GPR183 antagonist significantly attenuated the severity of SARS-CoV-2 infection and viral loads. Analysis of single-cell RNA-sequencing data on bronchoalveolar lavage samples from healthy controls and COVID-19 patients with moderate and severe disease revealed that CH25H, CYP7B1 and GPR183 are significantly upregulated in macrophages during COVID-19.

**Conclusion** This study demonstrates that oxysterols drive inflammation in the lung via GPR183 and provides the first preclinical evidence for the therapeutic benefit of targeting GPR183 during severe viral respiratory infections.

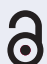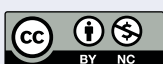

Supplement: inline-supplementary-material-2 [file inline-supplementary-material-2.pdf]
